# Supplementary material for: Phase transfer-based synthesis of HgS nanocrystals
Source: Royal Society of Chemistry journal article supplement (doi:10.1039/c4dt00998c), 2014-01-01
Supplement: c4dt00998c1.pdf [file c4dt00998c1.pdf]

## Electronic Supplementary Information

### Phase transfer-based synthesis of HgS nanocrystals

Lin Han,<sup>ab</sup> Pengfei Hou,<sup>bc</sup> Yan Feng,<sup>b</sup> Hui Liu,<sup>b</sup> Jianling Li,<sup>c</sup> Zhijian Peng<sup>a\*</sup> and Jun Yang<sup>b\*</sup>

<sup>a</sup> School of Engineering and Technology, China University of Geosciences, Beijing, China 100083.

Fax: 86-10-8232 0255; Tel: 86-10-8232 0255; Email: [pengzhijian@cugb.edu.cn](mailto:pengzhijian@cugb.edu.cn)

<sup>b</sup> State Key Laboratory of Multiphase Complex Systems, Institute of Process Engineering, Chinese Academy of Sciences, Beijing, China 100190. Fax: 86-10-8254 4915; Tel: 86-10-8254 4915; E-mail:

[jiyang@mail.ipe.ac.cn](mailto:jiyang@mail.ipe.ac.cn)

<sup>c</sup> State Key Laboratory of Advanced Metallurgy, University of Science and Technology Beijing, 30 College Road, Beijing, China 100083.

Financial support from the 100 Talents Program of the Chinese Academy of Sciences, National Natural Science Foundation of China (No.: 21173226, 21376247), and State Key Laboratory of Multiphase Complex Systems, Institute of Process Engineering, Chinese Academy of Sciences (MPCS-2012-A-11, MPCS-2011-D-08, MPCS-2010-C-02) is gratefully acknowledged.

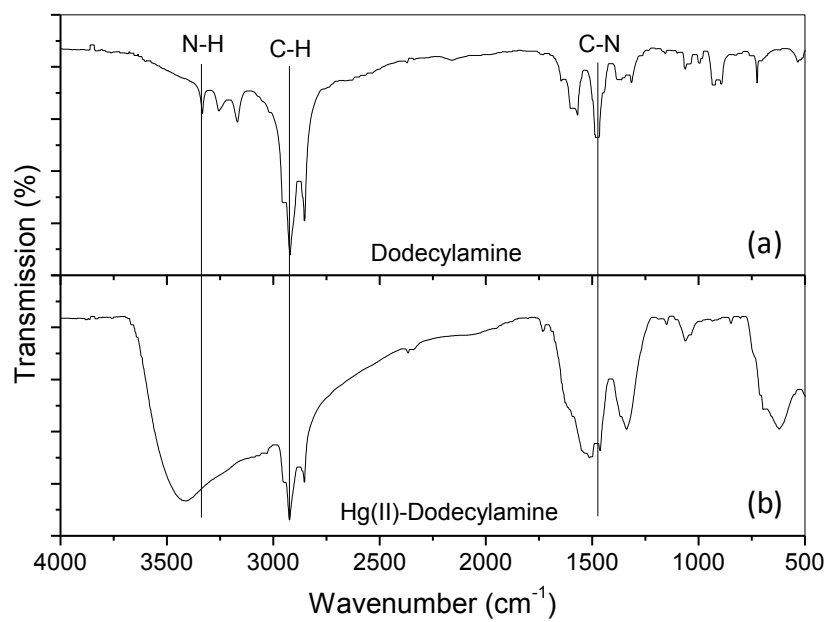

**Fig. S1** FTIR spectra of pure DDT (a) and Hg(II)-DDT complexes (b) recovered from toluene after phase transfer of Hg(II) ions.

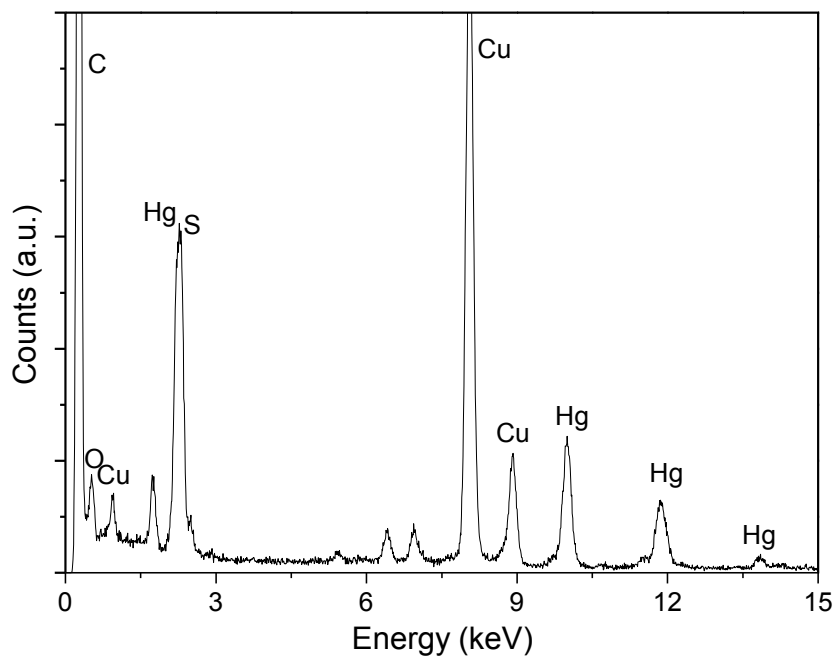

**Fig. S2** EDX analysis of HgS nanocrystals as-prepared in toluene at room temperature using phase transfer technique.

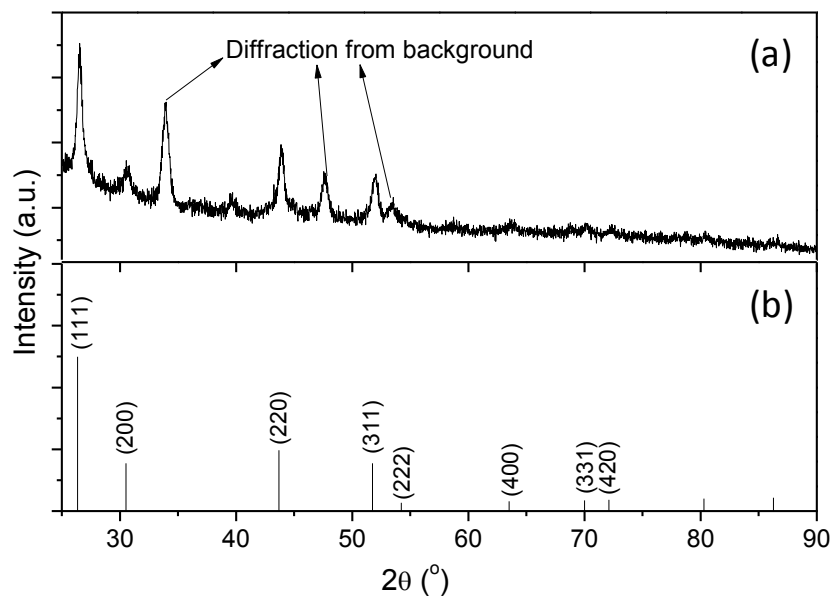

**Fig. S3** X-ray diffraction (XRD) pattern of the HgS nanocrystals as-prepared in toluene at room temperature (a) and the reference (b, JCPDS Card File 890432).

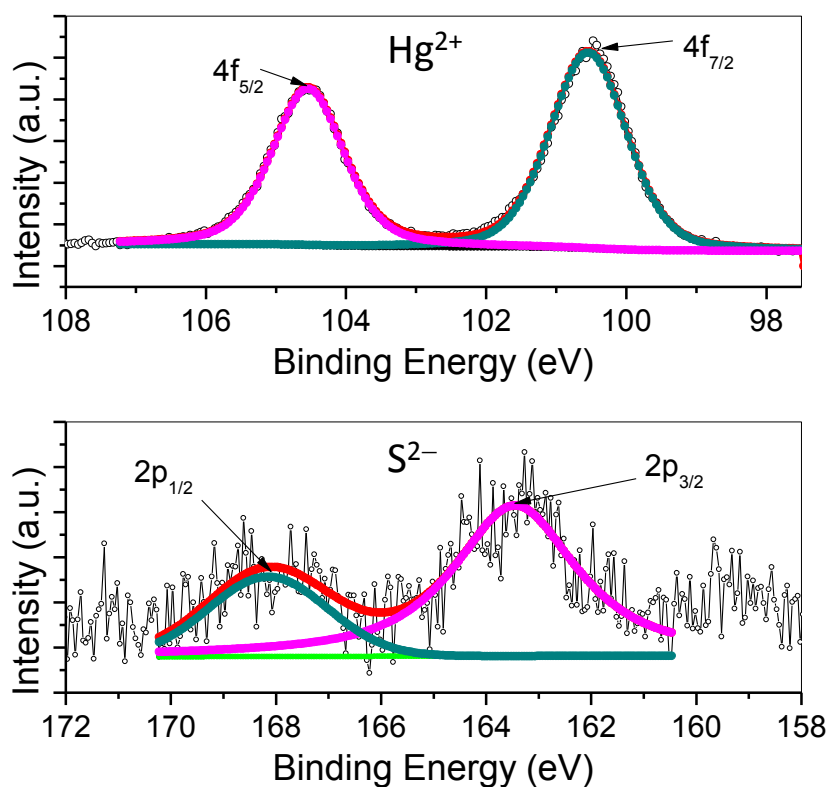

**Fig. S4** Hg 4f and S sp XPS spectra of the HgS nanocrystals as-prepared in toluene at room temperature.

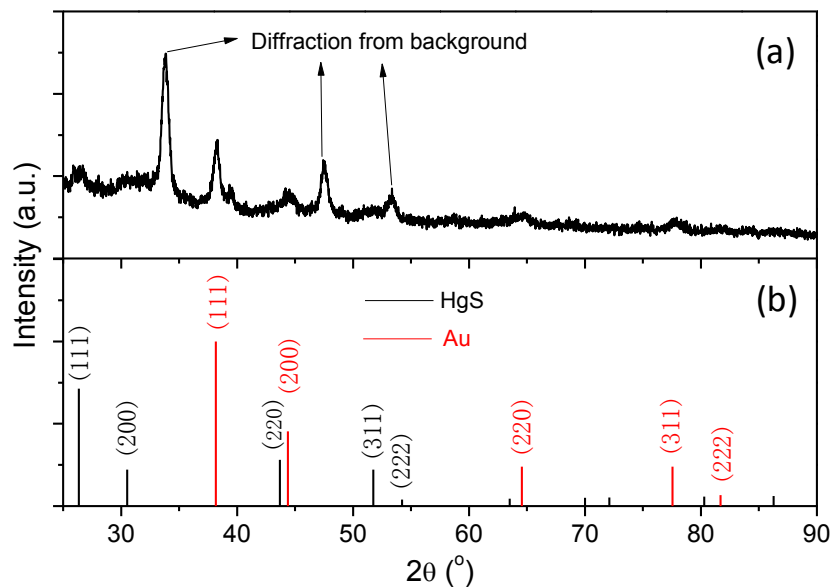

**Fig. S5** X-ray diffraction (XRD) pattern of the HgS-Au nanocomposites as-prepared in toluene at room temperature (a) and the reference (b, JCPDS Card File 893697 for Au and JCPDS Card File 890422 for HgS, respectively).

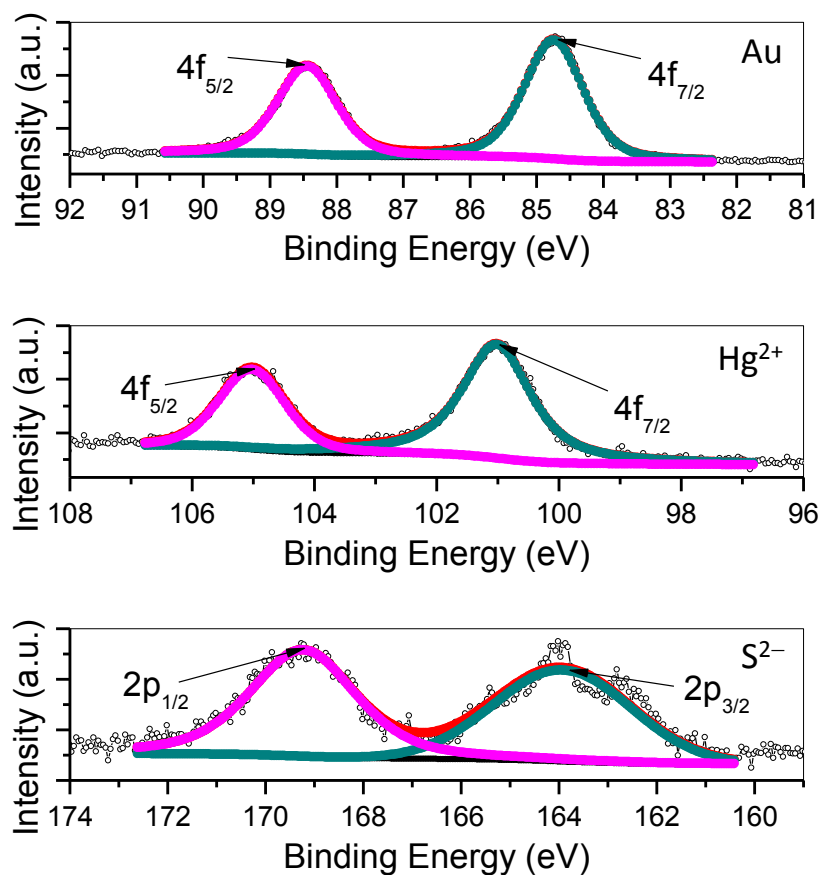

**Fig. S6** Au 4f, Hg 4f, and S sp XPS spectra of the HgS-Au nanocomposites as-prepared in toluene at room temperature.
